# Supplementary material for: One-pot synthesis of black biopolymeric eumelanin pigment by indigenous salt-tolerant Pseudomonas stutzeri SGM-1
Source: Royal Society of Chemistry journal article supplement (doi:10.1039/d2ma01097f), 2024-01-01
Supplement: d2ma01097f1.pdf [file d2ma01097f1.pdf]

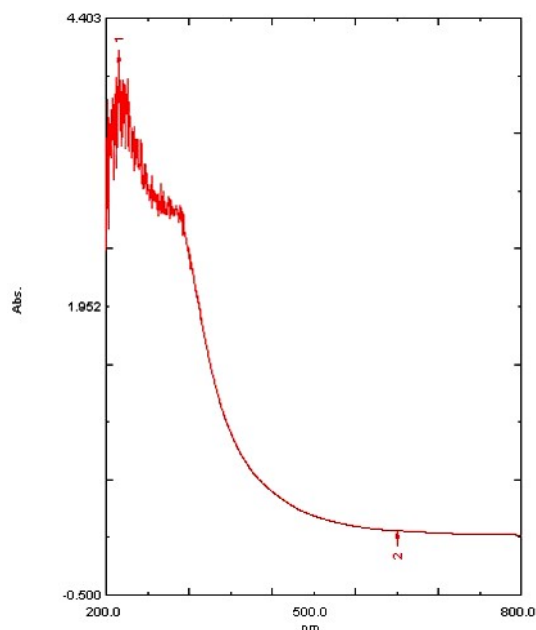

Supplementary Fig. 1

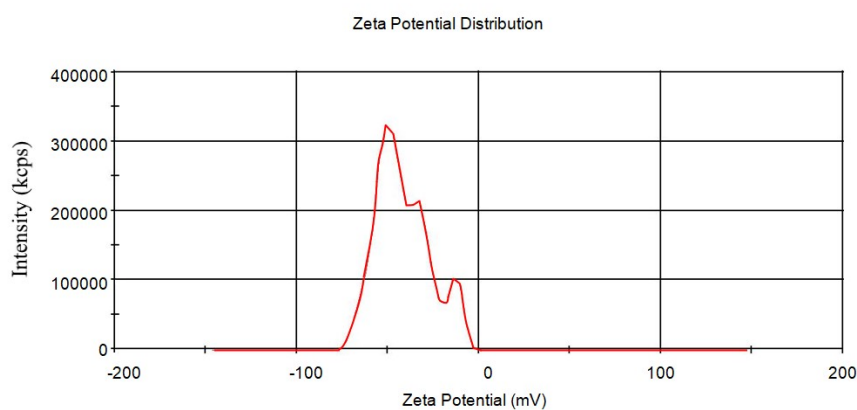

Supplementary Fig. 2

**Supplementary Fig. 1:** UV-Vis spectral measurement of colloidal eumelanin aqueous solution showed increased absorption toward the UV range (200-400 nm) confirming the ultraviolet light absorption property for produced eumelanin

**Supplementary Fig. 2:** The surface charge analysis by zeta potential analysis showed -41.7 mV with a zeta deviation of 14.8 mV and conductivity of 1.29 mS/cm thus the eumelanin micro-particles are considered stable with negatively charged.
